# Supplementary material
Source: Springer Nature journal article supplement (https://www.springermedizin.de/resource/supplementary/12985_2010_1397_MOESM3_ESM.pdf/9609648)

**N.I.**

**Ad-empty**

**AdE2**

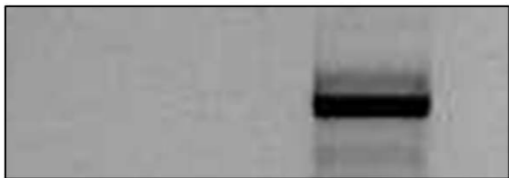

**E2**

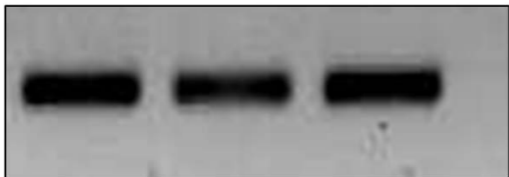

**GAPDH**

Supplement: MOESM3 [file 9609648]
